# Supplementary material
Source: PubMed Central journal article supplement (PMC5538877)
Supplement: Supplemental_Figures.pdf [file Supplemental_Figures.pdf]

**A****B**

| Flow pattern | Duration (hour) | RNAseq aligned read pairs (million) |        |
|--------------|-----------------|-------------------------------------|--------|
|              |                 | batch1                              | batch2 |
| Pulsatile    | 1               | 40.84                               | 41.05  |
| Pulsatile    | 4               | 43.71                               | 57.82  |
| Pulsatile    | 12              | 45.94                               | 59.09  |
| Pulsatile    | 24              | 41.46                               | 57.95  |
| Oscillatory  | 1               | 44.21                               | 57.72  |
| Oscillatory  | 4               | 45.21                               | 43.88  |
| Oscillatory  | 12              | 47.09                               | 69.50  |
| Oscillatory  | 24              | 44.09                               | 43.27  |
| Static       | 1               | 41.99                               | 48.44  |
| Static       | 4               | 41.85                               | 43.17  |
| Static       | 12              | 39.92                               | 63.68  |
| Static       | 24              | 43.44                               | 56.27  |

**Supplementary Figure 1. Analysis on RNA-seq data.** (A) The analysis pipeline used in this study. (B) Number of reads obtained in each samples.



**Supplementary Figure 2. Reads of novel lincRNAs in independent RNA-seq dataset.** Reanalysis of EC RNA-seq data in GSE71164 (Maleszewska, *et al* 2016) demonstrated the shear-responsive known and novel lincRNAs identified in our study are also presented in the ECs from different individuals. ST, Scr-static (GEO accession number GSM1828760, GSM1828761 and GSM1828762); LSS: Scr-flow shear stress 20 dyne/cm<sup>2</sup> (GSM1828766, GSM1828767 and GSM1828768), \*\*\*,  $p_{adj} < 10^{-5}$ , false discover rate by Benjamini-Hochberg method.

**A****B**

**Supplementary Figure 3. Knockdown of LINC00341 in PS-treated ECs.** (A) LINC00341 knockdown in ECs subjected to PS didn't significantly change the monocyte adhered to the ECs. (B) RNA expression levels of LINC00341 and VCAM1 were evaluated by RT-qPCR. \*,  $p < 0.05$ , \*\*,  $p < 0.01$ , Student's  $t$  test.



**Supplementary Figure 4. Distribution and downstream gene of LINC00341.** (A) The subcellular localization of LINC00341 is determined by RT-qPCR in different fractions of EC lysates. (B) LINC00341 were overexpressed in ECs subjected to shear stress and RNA expression level were determined by RT-qPCR. Bars are represented as mean  $\pm$  SEM



**A**

```

human ---AG-----AAACAAATTCCTC-CTTGTTCTTACTTTGAAAAACAGAAGTCGTTTCTC 50
mouse ---AA-----AAAAAAACCTCC-CTTGCTCTT-CTTTGATAAACGGAAGGCCTTCTC 49
bovine TTTAACTTCTTAAAAATGATTTCCACTTTTCTCACTTTGACAAACAGGAGGCCTTCTC 120
      *      *** *      * *** ** * ** ** * ** * ** * ** * ** * ** * ** *

human TCATACACAGAAGCTAAGGGAGAAACGACAGCTGGTTTTAAGTCCTCTTTGACTCTGGGC 110
mouse TCATTCTTTGGGGCTGAGGAAGAAATGTCAGCTGATTGGAAGTCCT--TTGGTTGCAACC 107
bovine TTATA-ATTGAAACT----AAGAAGTGATGG-----TCTAAGTCTT--CTGAATCTGCCC 168
      * *      * *      * * * * * * * * * * * * * * * * * * * * *

human CTCTGCTGAAGCAGCCTGCAGGCACTGGCAATTGGGTGATGAGGGCCACCTGTGGGGTGC 170
mouse TTGTACTGGAG-AGGCTCCAAGCTCTGTCTATTAGGTGATG-----GTGGG---- 152
bovine CTCTGCTGGAG-GCGCCGTGGGCTCCATCAGGCGGATGCTGGGAGCCACC--TGGGCTGT 225
      * * * * * * * * * * * * * * * * * * * * * * * * * * * * * * *

human CCCCACCCACTTTCCTTTTCAAAGCCTC----AATTGTCT-GCTACAAAAC---AAAGAG 222
mouse -----TCTC---AGTGACCT-GCTAGAAGGT---CAGAGG 180
bovine G-----TGCTCTCCCAAGTCTCTTTTGGGGGCTTAGCTGGAAAATGGGCGGGGG 275
      * * * * * * * * * * * * * * * * * * * * * * * * * * * * *

human CTGGCCTGGAAAGGCTCAGAGATCC---TCATTTTCCAAGATTTGCACCCAGGAGCTCCT 279
mouse CTGGTCTGAAAAAGCT-ATGGCTCTCTTTCCCTTCCAGGATTTGCTCCCAGGAGCTCCT 239
bovine GAAGCCTGGAAAAGCTCAGAAAAGCT---TCTCTTTTCAAGATGTGTCCCAGGAGTAACT 332
      * * * * * * * * * * * * * * * * * * * * * * * * * * * * *

human CAAGCTCAAGAAGAAATGAAAGCAAATATGCATTGCCTGGGCTGAATCCAAACACAAAAGA 339
mouse TGTGGCTAGGAGTGGCTGGAAGTTATTGTGAACCTCCAGAG--AGATCTGAACACAAAA- 296
bovine CATGTTCCAGAAGAAATTGAAGGAATAAAATTTCTGGGCTGAATTCAAACACA---- 388
      *      **      * * * * * * * * * * * * * * * * * * * * * *

```

**B**

**Supplementary Figure 6. Bovine and murine ortholog of LINC00341** (A) the murine and bovine ortholog of first segments of LINC00341 found in the UCSC MAF format of pairwise alignment. (B) Bovine- and murine-specific primers of LINC00341 orthologs were used to verify their expressions in commercially available artery endothelial cell of bovine (BAEC) and mouse (MAEC) by RT-qPCR. The no-RT control demonstrate the specificity of PCR primers. RT, reverse transcriptase. Bars represent mean  $\pm$  SEM.
