# Supplementary material
Source: PubMed Central journal article supplement (PMC5538877)
Supplement: Supplemental_Table_1.pdf [file Supplemental_Table_1.pdf]

**Supplementary table 1. PCR primers used in this study**

| Target                                       | Forward sequence        | Reverse sequence     |
|----------------------------------------------|-------------------------|----------------------|
| <b>RNA detection (human)</b>                 |                         |                      |
| GAPDH                                        | ACATCGCTCAGACACCATG     | ATGACAAGCTTCCCGTTCTC |
| LINC00341                                    | TCCTGGGTGCAAATCTTGGAA   | GGCACTGGCAATTGGGTGAT |
| RP1-140K8.5                                  | ATCAGCGTGGGACAAACAGT    | GGAGGGTGAGCGTCTATGTG |
| RP11-53O19.1                                 | ACTGTCTGCCTATATTGTACAGC | ACTTGGCTACCCTCTTAGCA |
| SYNE3                                        | AGGATCTGCAGCTGTGGAAG    | TTCCATCAGGGCTGCCTCG  |
| VCAM1                                        | GTCAATGTTGCCCCCAGAGA    | TTTTCGGAGCAGGAAAGCCC |
| XLOC040241                                   | AATCTCTACCCCTCTGCCGT    | AAAGCACCTGGCAAGACGTT |
| XLOC044990                                   | GGCAGATGAAGCACCAAACC    | GCAGGGTTGCATCCTGTCTT |
| <b>RNA detection (LINC00341 orthologues)</b> |                         |                      |
| Murine                                       | AGGTGATGGTGGGTCTCAGT    | TGGGAGCAAATCCTGGGAAG |
| Bovine                                       | GCTGTGTGTCCTCCCAAGTT    | ACTCCTGGGGACACATTCTG |
