# Supplementary material
Source: PubMed Central journal article supplement (PMC5538877)
Supplement: Supplemental_Table_2.pdf [file Supplemental_Table_2.pdf]

1 **Supplementary Table 1. Top 100 expressed novel transcripts**

| Name        | Chr   | # Exons | Start (per exon)                                          | End (per exon)                                            | Strand | Length | Mean Expression |
|-------------|-------|---------|-----------------------------------------------------------|-----------------------------------------------------------|--------|--------|-----------------|
| XLOC_011957 | Chr12 | 5       | 105863647;105871725;105873233;<br>105907434;105939117     | 105863796;105871781;105905360;<br>105907553;105973697     | +      | 67036  | 3247.00         |
| XLOC_044110 | Chr5  | 1       | 71146739                                                  | 71146944                                                  | +      | 206    | 1899.31         |
| XLOC_023926 | Chr17 | 6       | 62392893;62396451;62401341;624<br>06439;62407060;62407887 | 62392945;62401205;62401420;624<br>06535;62407711;62410762 | -      | 8513   | 1831.28         |
| XLOC_050386 | Chr8  | 2       | 22976139;22977891                                         | 22976439;22979524                                         | +      | 1935   | 1625.00         |
| XLOC_032169 | Chr2  | 1       | 133038628                                                 | 133038788                                                 | +      | 161    | 1542.28         |
| XLOC_028114 | Chr19 | 1       | 36066504                                                  | 36066753                                                  | +      | 250    | 1445.84         |
| XLOC_047011 | Chr6  | 1       | 3896709                                                   | 3902249                                                   | +      | 5541   | 1132.29         |
| XLOC_006545 | Chr10 | 4       | 4787282;4794117;4806497;482283<br>1                       | 4793871;4806345;4820410;482315<br>2                       | -      | 33055  | 1045.41         |
| XLOC_012484 | Chr12 | 2       | 14651871;14653710                                         | 14653247;14655827                                         | -      | 3495   | 996.41          |
| XLOC_033515 | Chr20 | 3       | 61577098;61580198;61583870                                | 61579156;61582361;61583952                                | -      | 4306   | 986.36          |
| XLOC_029256 | Chr2  | 3       | 132439411;132442282;132443903                             | 132440561;132443784;132443929                             | +      | 2681   | 920.18          |
| XLOC_041410 | Chr5  | 1       | 16662243                                                  | 16664452                                                  | +      | 2210   | 676.99          |
| XLOC_041175 | Chr4  | 1       | 70296622                                                  | 70296753                                                  | +      | 132    | 661.64          |

|             |       |   |                                                                    |                                                                    |   |       |        |
|-------------|-------|---|--------------------------------------------------------------------|--------------------------------------------------------------------|---|-------|--------|
| XLOC_022568 | Chr17 | 2 | 62494376;62494947                                                  | 62494471;62495732                                                  | + | 882   | 642.08 |
| XLOC_025109 | Chr18 | 4 | 26732812;26736931;26742555;26743900                                | 26734105;26737035;26742638;26744227                                | - | 1811  | 580.25 |
| XLOC_013562 | Chr12 | 1 | 127650867                                                          | 127650992                                                          | - | 126   | 565.67 |
| XLOC_046854 | Chr6  | 2 | 150379319;150382564                                                | 150382085;150384046                                                | - | 4250  | 542.45 |
| XLOC_054854 | Chr9  | 6 | 139527742;139536988;139538196;<br>139538598;139540858;139541573    | 139535853;139537039;139538473;<br>139539179;139541003;139541927    | - | 9525  | 534.61 |
| XLOC_044990 | Chr6  | 2 | 78182775;78188387                                                  | 78184368;78194512                                                  | + | 7720  | 508.59 |
| XLOC_022511 | Chr17 | 2 | 58254869;58255095                                                  | 58255041;58256311                                                  | + | 1390  | 498.76 |
| XLOC_048809 | Chr7  | 3 | 21309529;21324167;21354578                                         | 21309573;21334120;21355018                                         | - | 10440 | 491.44 |
| XLOC_024610 | Chr18 | 7 | 37550255;37552570;37553080;37555423;<br>37557822;37559156;37571681 | 37550602;37552662;37553154;37556707;<br>37557947;37560769;37571702 | + | 3563  | 445.52 |
| XLOC_005111 | Chr1  | 1 | 43792177                                                           | 43794630                                                           | + | 2454  | 440.79 |
| XLOC_040391 | Chr4  | 1 | 77860565                                                           | 77870777                                                           | - | 10213 | 432.33 |
| XLOC_044032 | Chr5  | 1 | 1345289                                                            | 1352178                                                            | + | 6890  | 401.58 |
| XLOC_006406 | Chr10 | 2 | 121331316;121333003                                                | 121331732;121334113                                                | + | 1528  | 399.36 |
| XLOC_010817 | Chr11 | 1 | 57591991                                                           | 57604539                                                           | + | 12549 | 397.75 |
| XLOC_033917 | Chr21 | 1 | 46784235                                                           | 46792523                                                           | + | 8289  | 391.64 |
| XLOC_052481 | Chr8  | 1 | 32627830                                                           | 32631747                                                           | + | 3918  | 389.27 |

|             |       |    |                                                                                                                                                                       |                                                                                                                                                                       |   |       |        |
|-------------|-------|----|-----------------------------------------------------------------------------------------------------------------------------------------------------------------------|-----------------------------------------------------------------------------------------------------------------------------------------------------------------------|---|-------|--------|
| XLOC_038325 | Chr3  | 2  | 185351428;185353252                                                                                                                                                   | 185353119;185359510                                                                                                                                                   | - | 7951  | 388.12 |
| XLOC_038260 | Chr3  | 6  | 178665618;178683233;178684667;<br>178684822;178685107;178700157                                                                                                       | 178679351;178683284;178684746;<br>178684868;178685153;178700841                                                                                                       | - | 14645 | 380.05 |
| XLOC_000842 | Chr1  | 5  | 59178658;59183429;59216092;592<br>18269;59224159                                                                                                                      | 59181313;59186327;59217449;592<br>23977;59225949                                                                                                                      | + | 14413 | 374.95 |
| XLOC_006544 | Chr10 | 2  | 4647559;4677315                                                                                                                                                       | 4650395;4690418                                                                                                                                                       | - | 15941 | 370.99 |
| XLOC_021405 | Chr16 | 6  | 86956751;86963593;86964795;869<br>66250;86983045;86985378                                                                                                             | 86963394;86963652;86966135;869<br>66896;86983171;86985557                                                                                                             | - | 8999  | 366.14 |
| XLOC_045657 | Chr6  | 2  | 3902428;3903142                                                                                                                                                       | 3902770;3904044                                                                                                                                                       | - | 1246  | 353.92 |
| XLOC_041565 | Chr5  | 2  | 42950966;42961041                                                                                                                                                     | 42960948;42967439                                                                                                                                                     | + | 16382 | 337.20 |
| XLOC_062503 | ChrX  | 2  | 100596677;100599618                                                                                                                                                   | 100597860;100600013                                                                                                                                                   | - | 1580  | 327.74 |
| XLOC_000844 | Chr1  | 3  | 59231006;59232147;59233505                                                                                                                                            | 59231859;59232169;59236401                                                                                                                                            | + | 3774  | 314.07 |
| XLOC_031669 | Chr2  | 1  | 204163159                                                                                                                                                             | 204171457                                                                                                                                                             | - | 8299  | 309.99 |
| XLOC_037694 | Chr3  | 15 | 104347521;104382735;104396719;<br>104443317;104446161;104483223;<br>104527962;104536317;104543742;<br>104548503;104574203;104576719;<br>104590883;104626056;104628718 | 104349423;104382861;104396813;<br>104443406;104446255;104483287;<br>104528543;104536457;104543806;<br>104548557;104574257;104576796;<br>104590930;104626488;104628909 | - | 4024  | 302.49 |
| XLOC_048250 | Chr7  | 1  | 121714152                                                                                                                                                             | 121714778                                                                                                                                                             | + | 627   | 297.66 |

|             |       |   |                                              |                                              |   |       |        |
|-------------|-------|---|----------------------------------------------|----------------------------------------------|---|-------|--------|
| XLOC_040241 | Chr4  | 1 | 56777962                                     | 56787648                                     | - | 9687  | 297.37 |
| XLOC_012707 | Chr12 | 5 | 46888092;46899599;46910820;46914348;46918039 | 46888160;46909806;46910876;46914459;46918172 | - | 10580 | 294.33 |
| XLOC_028076 | Chr19 | 1 | 9633886                                      | 9635721                                      | + | 1836  | 291.76 |
| XLOC_036769 | Chr3  | 1 | 170771817                                    | 170779080                                    | + | 7264  | 289.46 |
| XLOC_047112 | Chr6  | 1 | 48037881                                     | 48046781                                     | + | 8901  | 287.43 |
| XLOC_054036 | Chr9  | 1 | 35912430                                     | 35924534                                     | - | 12105 | 280.72 |
| XLOC_032127 | Chr2  | 1 | 96490009                                     | 96500986                                     | + | 10978 | 280.68 |
| XLOC_030005 | Chr2  | 2 | 237796242;237803579                          | 237801138;237804230                          | + | 5549  | 280.22 |
| XLOC_017516 | Chr15 | 1 | 35143312                                     | 35147725                                     | + | 4414  | 270.75 |
| XLOC_037316 | Chr3  | 1 | 44533102                                     | 44538311                                     | - | 5210  | 257.36 |
| XLOC_026018 | Chr19 | 1 | 21465626                                     | 21472325                                     | + | 6700  | 245.00 |
| XLOC_008478 | Chr11 | 2 | 63334350;63337830                            | 63337714;63340392                            | + | 5928  | 244.48 |
| XLOC_061420 | ChrX  | 1 | 108976698                                    | 108980887                                    | + | 4190  | 241.89 |
| XLOC_038214 | Chr3  | 1 | 172120056                                    | 172126428                                    | - | 6373  | 239.21 |
| XLOC_062982 | ChrX  | 1 | 2577848                                      | 2584520                                      | + | 6673  | 238.90 |
| XLOC_012321 | Chr12 | 4 | 6275948;6279232;6281363;628976               | 6279096;6280191;6282055;629026               | - | 5305  | 237.76 |
| XLOC_060763 | ChrX  | 1 | 23717423                                     | 23720050                                     | + | 2628  | 234.81 |
| XLOC_010173 | Chr11 | 2 | 72000734;72002028                            | 72001702;72002452                            | - | 1394  | 234.54 |

|             |       |   |                                     |                                     |   |       |        |
|-------------|-------|---|-------------------------------------|-------------------------------------|---|-------|--------|
| XLOC_045128 | Chr6  | 1 | 100951627                           | 100956046                           | + | 4420  | 232.67 |
| XLOC_038525 | Chr3  | 1 | 113432275                           | 113434547                           | + | 2273  | 226.97 |
| XLOC_035057 | Chr22 | 1 | 20139522                            | 20142977                            | - | 3456  | 224.01 |
| XLOC_047106 | Chr6  | 1 | 44207013                            | 44208401                            | + | 1389  | 221.50 |
| XLOC_050096 | Chr7  | 1 | 108097219                           | 108108167                           | + | 10949 | 216.41 |
| XLOC_045866 | Chr6  | 3 | 28388846;28392120;28394381          | 28391617;28394182;28394718          | - | 5173  | 213.55 |
| XLOC_042852 | Chr5  | 4 | 28146304;28155665;28156015;28156998 | 28154350;28155715;28156092;28157318 | - | 8497  | 211.98 |
| XLOC_040456 | Chr4  | 2 | 86924384;86927737                   | 86926714;86932364                   | - | 6959  | 210.36 |
| XLOC_044115 | Chr5  | 1 | 72221256                            | 72233558                            | + | 12303 | 206.75 |
| XLOC_022622 | Chr17 | 1 | 67070040                            | 67074589                            | + | 4550  | 199.00 |
| XLOC_036036 | Chr3  | 2 | 58164810;58165605                   | 58165455;58173224                   | + | 8266  | 198.77 |
| XLOC_022565 | Chr17 | 2 | 62396780;62399150                   | 62398823;62401249                   | + | 4144  | 195.72 |
| XLOC_051937 | Chr8  | 2 | 78256361;78269803                   | 78264102;78270708                   | - | 8648  | 192.20 |
| XLOC_050116 | Chr7  | 1 | 128279241                           | 128281538                           | + | 2298  | 189.94 |
| XLOC_025412 | Chr18 | 1 | 19785285                            | 19790056                            | + | 4772  | 187.10 |
| XLOC_041526 | Chr5  | 1 | 37075433                            | 37079792                            | + | 4360  | 185.39 |
| XLOC_028429 | Chr2  | 1 | 37062883                            | 37068209                            | + | 5327  | 184.76 |
| XLOC_031931 | Chr2  | 2 | 237069800;237072831                 | 237072184;237073631                 | - | 3186  | 180.76 |
| XLOC_012645 | Chr12 | 1 | 38720041                            | 38723499                            | - | 3459  | 180.45 |

|             |       |   |                                                       |                                                       |   |       |        |
|-------------|-------|---|-------------------------------------------------------|-------------------------------------------------------|---|-------|--------|
| XLOC_061775 | ChrX  | 3 | 152775803;152781427;152781767                         | 152781282;152781603;152783046                         | + | 6937  | 179.43 |
| XLOC_013702 | Chr12 | 1 | 60179904                                              | 60183619                                              | + | 3716  | 178.91 |
| XLOC_019158 | Chr15 | 5 | 95768159;95789836;95799903;95802765;95803700          | 95771461;95799117;95800005;95802977;95803756          | - | 12958 | 178.74 |
| XLOC_031997 | Chr2  | 2 | 242514403;242514985                                   | 242514637;242518854                                   | - | 4105  | 173.96 |
| XLOC_005260 | Chr1  | 1 | 148356090                                             | 148359328                                             | + | 3239  | 172.13 |
| XLOC_054963 | Chr9  | 1 | 67308728                                              | 67322337                                              | + | 13610 | 170.82 |
| XLOC_027561 | Chr19 | 1 | 40487814                                              | 40489746                                              | - | 1933  | 170.11 |
| XLOC_034361 | Chr21 | 1 | 46293972                                              | 46295709                                              | + | 1738  | 165.81 |
| XLOC_041309 | Chr5  | 2 | 259463;263424                                         | 262416;263505                                         | + | 3036  | 163.46 |
| XLOC_017814 | Chr15 | 2 | 62465220;62466112                                     | 62465922;62470319                                     | + | 4911  | 156.00 |
| XLOC_017247 | Chr14 | 1 | 86098809                                              | 86109296                                              | + | 10488 | 152.19 |
| XLOC_008706 | Chr11 | 2 | 73472223;73472782                                     | 73472285;73477116                                     | + | 4398  | 151.56 |
| XLOC_063061 | ChrX  | 1 | 75411141                                              | 75414458                                              | + | 3318  | 151.19 |
| XLOC_036774 | Chr3  | 1 | 171309623                                             | 171317626                                             | + | 8004  | 150.98 |
| XLOC_054443 | Chr9  | 3 | 99656388;99659299;99660217                            | 99658319;99659460;99660252                            | - | 2130  | 150.94 |
| XLOC_061618 | ChrX  | 1 | 134168370                                             | 134174797                                             | + | 6428  | 148.87 |
| XLOC_049187 | Chr7  | 6 | 65186588;65191744;65192028;65196535;65205858;65215870 | 65189314;65191917;65192081;65197022;65206107;65215926 | - | 3750  | 146.66 |

|             |       |   |                     |                     |   |      |        |
|-------------|-------|---|---------------------|---------------------|---|------|--------|
| XLOC_004985 | Chr1  | 2 | 244470091;244488397 | 244472916;244488465 | - | 2895 | 144.60 |
| XLOC_054629 | Chr9  | 1 | 120483057           | 120487501           | - | 4445 | 143.13 |
| XLOC_036252 | Chr3  | 2 | 101406013;101411202 | 101406936;101418889 | + | 8612 | 140.18 |
| XLOC_025829 | Chr19 | 2 | 13948850;13952935   | 13952457;13953551   | + | 4225 | 139.71 |
| XLOC_035542 | Chr22 | 1 | 37860659            | 37861135            | + | 477  | 138.97 |

- 1
- 2
- 3
