# Supplementary material
Source: PubMed Central journal article supplement (PMC5538877)
Supplement: Supplemental_Table_3.pdf [file Supplemental_Table_3.pdf]

| Symbol     | corr       | padj     |
|------------|------------|----------|
| LINC00341  | 1          | 0        |
| TSC22D3    | 0.94722614 | 2.45E-08 |
| CLEC3B     | 0.90458076 | 7.19E-06 |
| AGPAT1     | 0.90400385 | 7.19E-06 |
| UBXN8      | 0.89777636 | 8.01E-06 |
| ZNF467     | 0.89752245 | 8.01E-06 |
| PLCD3      | 0.89678438 | 8.01E-06 |
| EPHB4      | 0.89469023 | 8.01E-06 |
| INPP5K     | 0.89245725 | 8.01E-06 |
| TFEB       | 0.89163758 | 8.01E-06 |
| WIPI2      | 0.89150998 | 8.01E-06 |
| ABCB6      | 0.88992646 | 8.65E-06 |
| ATG9B      | 0.88806671 | 9.63E-06 |
| KCTD2      | 0.88678494 | 1.02E-05 |
| JPH4       | 0.88552994 | 1.02E-05 |
| NDRG4      | 0.88021989 | 1.54E-05 |
| CUEDC1     | 0.87512548 | 2.15E-05 |
| PHYH       | 0.87303302 | 2.29E-05 |
| RAMP2      | 0.87219044 | 2.29E-05 |
| UNC13D     | 0.87154643 | 2.29E-05 |
| C14orf1    | 0.87023758 | 2.38E-05 |
| C6orf47    | 0.86940504 | 2.38E-05 |
| TKT        | 0.86910327 | 2.38E-05 |
| DSTNP2     | 0.86679249 | 2.68E-05 |
| PODNL1     | 0.86607709 | 2.75E-05 |
| G6PD       | 0.86414165 | 3.09E-05 |
| TMEM173    | 0.86151914 | 3.38E-05 |
| CAT        | 0.86107023 | 3.38E-05 |
| PLCD1      | 0.85982001 | 3.38E-05 |
| PPAP2A     | 0.85905208 | 3.38E-05 |
| HIST1H2AC  | 0.85884263 | 3.38E-05 |
| TPRG1L     | 0.85879755 | 3.38E-05 |
| LINC00622  | 0.85870799 | 3.38E-05 |
| FNDC4      | 0.85722966 | 3.48E-05 |
| HSPB8      | 0.85720684 | 3.48E-05 |
| ZFYVE28    | 0.85516909 | 3.86E-05 |
| HEXIM1     | 0.85499809 | 3.86E-05 |
| FCN3       | 0.85386683 | 4.10E-05 |
| AC007362.1 | 0.85056432 | 4.68E-05 |
| SMPD1      | 0.85050503 | 4.68E-05 |
| DNASE1L1   | 0.85016754 | 4.71E-05 |
| VIPR1      | 0.84991101 | 4.72E-05 |
| CREB3      | 0.84869611 | 5.02E-05 |
| NPR1       | 0.84811128 | 5.02E-05 |
| AQP3       | 0.84790862 | 5.02E-05 |
| EPHX1      | 0.84592556 | 5.65E-05 |
| GSN        | 0.84552221 | 5.72E-05 |

|              |            |            |
|--------------|------------|------------|
| USP5         | 0.84531787 | 5.72E-05   |
| HDAC5        | 0.84406414 | 6.02E-05   |
| NQO1         | 0.84392735 | 6.02E-05   |
| ACVRL1       | 0.84302039 | 6.14E-05   |
| TRPV2        | 0.84301962 | 6.14E-05   |
| P4HB         | 0.84258716 | 6.23E-05   |
| MOB3C        | 0.84209595 | 6.35E-05   |
| CAPNS1       | 0.84152291 | 6.35E-05   |
| SLC41A3      | 0.84128757 | 6.35E-05   |
| VIP          | 0.84118547 | 6.35E-05   |
| TMBIM4       | 0.84075236 | 6.45E-05   |
| CRTAC1       | 0.84007422 | 6.58E-05   |
| GPX3         | 0.83976075 | 6.58E-05   |
| AKT1S1       | 0.83971995 | 6.58E-05   |
| TSPAN9       | 0.83848123 | 6.81E-05   |
| PTGR1        | 0.83836615 | 6.81E-05   |
| COL23A1      | 0.83718942 | 7.08E-05   |
| PSORS1C1     | 0.83667726 | 7.17E-05   |
| TRIM16       | 0.83582097 | 7.37E-05   |
| RUFY1        | 0.83527284 | 7.39E-05   |
| RILPL2       | 0.83361307 | 7.86E-05   |
| MAGIX        | 0.83352028 | 7.86E-05   |
| RHOA         | 0.83350554 | 7.86E-05   |
| LINC00324    | 0.83281384 | 8.09E-05   |
| HM13         | 0.83175552 | 8.40E-05   |
| LGALSL       | 0.83066039 | 8.57E-05   |
| LIMS2        | 0.83026423 | 8.69E-05   |
| NFS1         | 0.82999365 | 8.69E-05   |
| KIAA1324     | 0.82948538 | 8.76E-05   |
| STPG1        | 0.82913621 | 8.76E-05   |
| IL3RA        | 0.82909654 | 8.76E-05   |
| TMEM8B       | 0.82846611 | 9.02E-05   |
| CTB-25B13.1  | 0.8274888  | 9.21E-05   |
| FTLP3        | 0.82732298 | 9.23E-05   |
| ANKRD55      | 0.82655655 | 9.31E-05   |
| PGRMC2       | 0.82643608 | 9.31E-05   |
| AC013283.1   | 0.82632966 | 9.31E-05   |
| EAPP         | 0.82613627 | 9.35E-05   |
| FAM189B      | 0.82418526 | 0.00010119 |
| RP11-798K2.3 | 0.8241674  | 0.00010119 |
| PPCS         | 0.82406436 | 0.00010119 |
| FAM134A      | 0.82363595 | 0.00010236 |
| ZER1         | 0.82287324 | 0.00010387 |
| DKFZP761J1.1 | 0.82279006 | 0.00010387 |
| LINC00035    | 0.82254509 | 0.00010419 |
| TMEM184B     | 0.82211813 | 0.00010543 |
| B3GNT8       | 0.82173785 | 0.00010578 |
| NINJ2        | 0.82047344 | 0.00011093 |

|              |            |            |
|--------------|------------|------------|
| DOK4         | 0.8198943  | 0.00011254 |
| VAR52        | 0.81947861 | 0.00011393 |
| PINK1        | 0.81931959 | 0.00011429 |
| LYPD1        | 0.81914061 | 0.00011478 |
| CAPN1        | 0.81890322 | 0.00011565 |
| CPAMD8       | 0.81822141 | 0.00011747 |
| RP11-392P7.6 | 0.81664936 | 0.00012373 |
| ADAMTS10     | 0.81643848 | 0.00012373 |
| HINFP        | 0.81596376 | 0.00012563 |
| C15orf52     | 0.81584022 | 0.00012563 |
| RRAGA        | 0.8150866  | 0.00012804 |
| ARSG         | 0.81448372 | 0.00013054 |
| RP11-373D2.3 | 0.81420035 | 0.00013191 |
| MOB3A        | 0.81330146 | 0.00013659 |
| LMCD1        | 0.81328833 | 0.00013659 |
| RP11-48B3.4  | 0.8131672  | 0.00013659 |
| GTF2IRD2     | 0.81307557 | 0.00013659 |
| RTKN         | 0.81306213 | 0.00013659 |
| TMEM171      | 0.81272513 | 0.00013659 |
| ACP2         | 0.81255971 | 0.00013659 |
| PRMT2        | 0.81242136 | 0.00013659 |
| AP2M1        | 0.81236593 | 0.00013659 |
| RNF8         | 0.81212225 | 0.00013659 |
| CALHM2       | 0.8120414  | 0.00013659 |
| CMAS         | 0.81154804 | 0.00013735 |
| ALDH3A1      | 0.81131419 | 0.00013735 |
| FTH1         | 0.81126742 | 0.00013735 |
| SNX3         | 0.81094062 | 0.00013915 |
| ZFAND2B      | 0.81047478 | 0.0001392  |
| AP001007.1   | 0.81025692 | 0.0001392  |
| DLL1         | 0.81014776 | 0.0001392  |
| HVCN1        | 0.81004558 | 0.0001392  |
| C9orf9       | 0.80996748 | 0.0001392  |
| NAT6         | 0.80984868 | 0.0001392  |
| MPC1         | 0.809677   | 0.0001392  |
| SERPINB6     | 0.80940055 | 0.0001392  |
| GPANK1       | 0.80921126 | 0.00013957 |
| DYNC2LI1     | 0.80876904 | 0.00014107 |
| SLC48A1      | 0.80843517 | 0.00014197 |
| PRAF2        | 0.80812425 | 0.00014315 |
| MTIF3        | 0.80782268 | 0.0001443  |
| NLRC4        | 0.8075981  | 0.00014544 |
| SPATA20      | 0.80723019 | 0.00014565 |
| SFRP5        | 0.80717201 | 0.00014565 |
| SNORA40      | 0.8071306  | 0.00014565 |
| BMP1         | 0.80634145 | 0.0001494  |
| KLC4         | 0.8061327  | 0.0001494  |
| AF131217.1   | 0.80591476 | 0.00014947 |

|             |            |            |
|-------------|------------|------------|
| DUSP4       | 0.80589363 | 0.00014947 |
| IQCG        | 0.80569991 | 0.00015007 |
| C16orf45    | 0.80470949 | 0.00015411 |
| ARHGEF15    | 0.80469846 | 0.00015411 |
| UBXN6       | 0.80455265 | 0.00015418 |
| CRAT        | 0.8042817  | 0.00015509 |
| SYBU        | 0.80426414 | 0.00015509 |
| SMTNL2      | 0.80423371 | 0.00015509 |
| PI4K2A      | 0.80376636 | 0.00015792 |
| MTFR1L      | 0.80374581 | 0.00015792 |
| LAMB2       | 0.80367046 | 0.00015798 |
| ROGDI       | 0.80214398 | 0.00016654 |
| ZNF404      | 0.80210682 | 0.00016654 |
| TBC1D17     | 0.80165026 | 0.0001698  |
| RNF10       | 0.80107552 | 0.00017316 |
| GPR137      | 0.80106494 | 0.00017316 |
| POR         | 0.80086434 | 0.00017379 |
| RAPSN       | 0.80031911 | 0.00017515 |
| TMBIM1      | 0.80006723 | 0.00017568 |
| LINC00888   | 0.79999704 | 0.00017574 |
| ATP6AP2     | 0.79954807 | 0.00017834 |
| SLC39A11    | 0.79941561 | 0.00017834 |
| LMNA        | 0.79932639 | 0.00017834 |
| TG          | 0.79879594 | 0.00018198 |
| SGSM3       | 0.79866669 | 0.00018258 |
| TMBIM6      | 0.79782461 | 0.00018747 |
| TMEM189     | 0.7971282  | 0.00019133 |
| OMA1        | 0.79673504 | 0.00019391 |
| MSMO1       | 0.79653251 | 0.00019391 |
| FEZ1        | 0.79635881 | 0.00019416 |
| EVI5L       | 0.79632777 | 0.00019416 |
| PSMG3-AS1   | 0.79632687 | 0.00019416 |
| AAED1       | 0.79610521 | 0.00019514 |
| TMEM45A     | 0.79500232 | 0.00020096 |
| MICAL1      | 0.79483033 | 0.00020096 |
| MAN1B1      | 0.79476922 | 0.00020096 |
| GSTK1       | 0.79465722 | 0.00020096 |
| PSAP        | 0.79454446 | 0.00020096 |
| PANX2       | 0.79451497 | 0.00020096 |
| RNASE1      | 0.79406657 | 0.0002048  |
| CFHR1       | 0.79397688 | 0.00020513 |
| SMIM20      | 0.79311363 | 0.0002111  |
| SLC39A7     | 0.79309987 | 0.0002111  |
| FAM134C     | 0.7928371  | 0.00021195 |
| BX936347.1  | 0.79280907 | 0.00021195 |
| PIIB        | 0.79265692 | 0.00021254 |
| ANPEP       | 0.79251662 | 0.00021306 |
| RP11-1180F2 | 0.79226902 | 0.00021503 |

|             |            |            |
|-------------|------------|------------|
| SNUPN       | 0.79199408 | 0.00021672 |
| NACAD       | 0.79196609 | 0.00021672 |
| DAXX        | 0.79187518 | 0.0002168  |
| PEX11A      | 0.79182218 | 0.0002168  |
| RASA4CP     | 0.79153417 | 0.00021891 |
| KLHDC8B     | 0.79121786 | 0.00022029 |
| PPP1R7      | 0.79119354 | 0.00022029 |
| AC005789.11 | 0.79107063 | 0.00022068 |
| FTH1P20     | 0.79071505 | 0.00022337 |
| HLA-E       | 0.79060107 | 0.00022382 |
| CYB5D2      | 0.79055811 | 0.00022382 |
| HDAC7       | 0.79037361 | 0.00022522 |
| BRE         | 0.79026088 | 0.00022585 |
| ANG         | 0.7899595  | 0.00022852 |
| CALR        | 0.78960973 | 0.00023104 |
| NPPC        | 0.78946572 | 0.00023104 |
| CTA-963H5.4 | 0.78930782 | 0.00023157 |
| ARL6IP5     | 0.78919116 | 0.00023227 |
| RAB9A       | 0.78893049 | 0.00023439 |
| SLC35E4     | 0.78882895 | 0.00023439 |
| PTGS1       | 0.7887601  | 0.00023439 |
| ERCC5       | 0.78863074 | 0.00023439 |
| PDIA4       | 0.78861173 | 0.00023439 |
| TBXA2R      | 0.78832947 | 0.0002353  |
| FBXO8       | 0.788328   | 0.0002353  |
| GLRX        | 0.78808589 | 0.0002358  |
| LAMB3       | 0.78806431 | 0.0002358  |
| LRRC27      | 0.78804472 | 0.0002358  |
| FLYWCH1     | 0.7876168  | 0.00023718 |
| ASS1        | 0.7873662  | 0.00023827 |
| AC084125.4  | 0.7873174  | 0.00023827 |
| DYX1C1      | 0.78712692 | 0.00023874 |
| DSTN        | 0.78698171 | 0.00023936 |
| CBR1        | 0.7868836  | 0.0002398  |
| ST8SIA6-AS  | 0.78660966 | 0.00024083 |
| FKBP1B      | 0.7865956  | 0.00024083 |
| YIPF2       | 0.78643811 | 0.00024205 |
| SLC22A4     | 0.78598324 | 0.0002442  |
| CCDC104     | 0.7859372  | 0.0002442  |
| SLC10A3     | 0.78588617 | 0.0002442  |
| PSPN        | 0.78587243 | 0.0002442  |
| GPER1       | 0.78539273 | 0.00024679 |
| MMP24-AS1   | 0.78468837 | 0.00025438 |
| ACRC        | 0.78453591 | 0.00025449 |
| HADHB       | 0.78331802 | 0.00026187 |
| DUSP22      | 0.78320962 | 0.00026187 |
| S1PR4       | 0.78240074 | 0.00027014 |
| TCTA        | 0.78203302 | 0.00027301 |

|             |            |            |
|-------------|------------|------------|
| ITLN2       | 0.78189589 | 0.00027396 |
| IPO13       | 0.78176369 | 0.00027504 |
| KCNN4       | 0.78164995 | 0.00027546 |
| ERBB2       | 0.78151146 | 0.00027613 |
| LTBR        | 0.7809856  | 0.00028063 |
| RP5-821D11. | 0.78006515 | 0.00028692 |
| MED16       | 0.78005805 | 0.00028692 |
| NSDHL       | 0.77995352 | 0.00028718 |
| RXRA        | 0.77989748 | 0.00028718 |
| EFEMP2      | 0.77980308 | 0.00028718 |
| SYNGR2      | 0.77979923 | 0.00028718 |
| DNAJB2      | 0.77977214 | 0.00028718 |
| HOXD8       | 0.77944779 | 0.00028977 |
| RMDN2-AS1   | 0.77943829 | 0.00028977 |
| SOX2        | 0.77931823 | 0.00029076 |
| CTC-444N24  | 0.77910209 | 0.00029301 |
| KIAA1522    | 0.7788376  | 0.00029477 |
| ABCB9       | 0.77858052 | 0.00029758 |
| PMP22       | 0.77828025 | 0.00029862 |
| CCDC9       | 0.77813496 | 0.00029889 |
| SULT1A1     | 0.77778589 | 0.00030126 |
| PRICKLE4    | 0.77768424 | 0.00030162 |
| ST6GALNAC   | 0.7776395  | 0.00030162 |
| UBE2A       | 0.77763066 | 0.00030162 |
| CTD-2319I12 | 0.77747351 | 0.00030315 |
| SLC35C2     | 0.77715521 | 0.0003063  |
| PLD2        | 0.7770617  | 0.00030642 |
| AC092171.4  | 0.77653662 | 0.00031186 |
| RTN2        | 0.77617702 | 0.00031509 |
| BFSP1       | 0.77570156 | 0.00031826 |
| MVP         | 0.77558713 | 0.00031923 |
| RPL17-C18ot | 0.77550474 | 0.00031952 |
| UFSP2       | 0.77531643 | 0.00032128 |
| DEDD2       | 0.77482102 | 0.00032715 |
| ATPAF2      | 0.77397364 | 0.00033704 |
| MAPK7       | 0.77378823 | 0.00033916 |
| ZRSR2       | 0.77374433 | 0.0003392  |
| DEXI        | 0.77366747 | 0.00033973 |
| SYS1        | 0.77290744 | 0.00034801 |
| MIR503HG    | 0.77281081 | 0.00034849 |
| CTB-113P19. | 0.77273214 | 0.00034849 |
| AC093668.2  | 0.77253878 | 0.00034991 |
| TMEM120A    | 0.7725371  | 0.00034991 |
| AGPAT9      | 0.7722143  | 0.00035377 |
| ULK1        | 0.77220239 | 0.00035377 |
| UBE2F       | 0.77211932 | 0.00035442 |
| CCND3       | 0.77202033 | 0.00035445 |
| OBSL1       | 0.77184622 | 0.00035614 |

|            |            |            |
|------------|------------|------------|
| SELPLG     | 0.77165827 | 0.00035841 |
| ORAI2      | 0.77143984 | 0.00036051 |
| ECM1       | 0.77119966 | 0.00036267 |
| OS9        | 0.77085928 | 0.0003665  |
| LRRC23     | 0.7706155  | 0.00036669 |
| DDIT4      | 0.77059448 | 0.00036669 |
| EGLN3      | 0.77022594 | 0.00036962 |
| HPS1       | 0.76992979 | 0.00037308 |
| EEF1A1     | 0.7696231  | 0.00037548 |
| TBC1D22A   | 0.76934261 | 0.00037937 |
| CIR1       | 0.76885957 | 0.00038533 |
| MOCS2      | 0.768716   | 0.00038665 |
| MLYCD      | 0.76867584 | 0.00038665 |
| DDAH2      | 0.76866224 | 0.00038665 |
| AC026806.2 | 0.76857828 | 0.00038676 |
| ATP13A2    | 0.7682759  | 0.00038984 |
| TM2D2      | 0.76783123 | 0.00039403 |
| PGD        | 0.76776543 | 0.00039449 |
| WBP5       | 0.76771583 | 0.00039468 |
| OSTC       | 0.76725399 | 0.00040116 |
| DGKA       | 0.76721283 | 0.00040121 |
| LCN6       | 0.76678801 | 0.0004078  |
| AF131215.9 | 0.76663267 | 0.00040808 |
| OAZ3       | 0.76643174 | 0.00041002 |
| SLC12A9    | 0.76619394 | 0.00041247 |
| PNPLA6     | 0.7660771  | 0.00041247 |
| MFSD11     | 0.76606711 | 0.00041247 |
| RP11-73M18 | 0.76606376 | 0.00041247 |
| ATG9A      | 0.76594384 | 0.00041309 |
| DGAT1      | 0.76591568 | 0.00041309 |
| C1orf216   | 0.76579266 | 0.00041457 |
| RNU5B-4P   | 0.76555851 | 0.0004167  |
| CLEC4A     | 0.76548313 | 0.00041737 |
| ISY1       | 0.76510611 | 0.00042254 |
| KIAA0930   | 0.76507741 | 0.00042254 |
| TSPAN17    | 0.76482578 | 0.00042477 |
| SLC9A3R2   | 0.7645084  | 0.0004287  |
| PLEKHF1    | 0.76424438 | 0.00043145 |
| ITGB5      | 0.7641255  | 0.00043219 |
| PREB       | 0.76410562 | 0.00043219 |
| ZNF30      | 0.76409346 | 0.00043219 |
| SLC3A2     | 0.76394786 | 0.0004335  |
| THBS3      | 0.76354751 | 0.00043942 |
| PFKFB4     | 0.76348559 | 0.00043956 |
| THAP8      | 0.7634671  | 0.00043956 |
| GSTA4      | 0.7633504  | 0.00044078 |
| WDR45      | 0.76322164 | 0.0004414  |
| GLIPR2     | 0.76312095 | 0.00044183 |

|             |            |            |
|-------------|------------|------------|
| TSPYL1      | 0.7630896  | 0.00044183 |
| ING4        | 0.76267566 | 0.00044759 |
| AL590822.1  | 0.76222889 | 0.00045247 |
| RP11-326F20 | 0.76219003 | 0.00045247 |
| LGALS3      | 0.7619915  | 0.00045511 |
| LINC00662   | 0.76197759 | 0.00045511 |
| CRIP2       | 0.76189039 | 0.00045571 |
| ANXA9       | 0.76177061 | 0.00045602 |
| GATSL3      | 0.76176136 | 0.00045602 |
| DYRK1B      | 0.76175167 | 0.00045602 |
| ATP6V1H     | 0.76160298 | 0.00045814 |
| MUL1        | 0.76148924 | 0.00045962 |
| MXD4        | 0.76134849 | 0.00046025 |
| ZDHC16      | 0.76127965 | 0.00046025 |
| FADS2       | 0.76106809 | 0.00046292 |
| TFE3        | 0.76078899 | 0.00046757 |
| PHYKPL      | 0.76061666 | 0.00046953 |
| LPL         | 0.76050337 | 0.00047103 |
| OTUB2       | 0.75999627 | 0.00047729 |
| BLCAP       | 0.75981673 | 0.00047894 |
| NUCB1       | 0.75963778 | 0.00048176 |
| TRAPPC6A    | 0.75944063 | 0.00048355 |
| GTF2IRD2B   | 0.75925088 | 0.00048427 |
| WDR25       | 0.75874446 | 0.00048988 |
| SGSH        | 0.75868852 | 0.00049023 |
| BAIAP2      | 0.75829786 | 0.00049438 |
| SLC27A4     | 0.75828027 | 0.00049438 |
| TEX264      | 0.75816335 | 0.00049604 |
| PRDX1       | 0.75796116 | 0.00049739 |
| YIPF1       | 0.75785579 | 0.00049883 |
| CAMKK1      | 0.75778339 | 0.00049961 |
| RP1-90J20.1 | 0.75771395 | 0.00049966 |
| CPQ         | 0.75744678 | 0.00050254 |
| POLD4       | 0.75727644 | 0.00050254 |
| SLC30A3     | 0.7572658  | 0.00050254 |
| MEI1        | 0.75714625 | 0.00050372 |
| NQO2        | 0.75699707 | 0.00050607 |
| B4GALT3     | 0.75681446 | 0.00050844 |
| ACSF2       | 0.75668735 | 0.00051036 |
| KLC1        | 0.75662926 | 0.00051047 |
| AKAP8L      | 0.75661588 | 0.00051047 |
| CARD10      | 0.7562556  | 0.00051517 |
| LSMEM1      | 0.75615715 | 0.00051585 |
| SLC22A31    | 0.75597817 | 0.0005181  |
| MVK         | 0.75585067 | 0.00051852 |
| CAPS        | 0.75584015 | 0.00051852 |
| AIFM2       | 0.75558585 | 0.00052228 |
| RP11-305K5  | 0.75489625 | 0.00053405 |



|             |            |            |
|-------------|------------|------------|
| SCAMP3      | 0.75457549 | 0.00053768 |
| RPS6KB2     | 0.75452114 | 0.00053768 |
| TBXAS1      | 0.75449942 | 0.00053768 |
| RP11-612B6. | 0.75444119 | 0.00053824 |
| MAP4K2      | 0.75430978 | 0.00053967 |
| RP11-286H15 | 0.75415058 | 0.00054171 |
| DNAJB1      | 0.75408752 | 0.00054238 |
| C11orf49    | 0.75376261 | 0.00054662 |
| FAM110D     | 0.75374477 | 0.00054662 |
| OSBPL7      | 0.7537318  | 0.00054662 |
| FOXD4       | 0.75373101 | 0.00054662 |
| TPST2       | 0.75351266 | 0.00054823 |
| NFATC1      | 0.75347018 | 0.00054823 |
| IL17RC      | 0.75346579 | 0.00054823 |
| GPR162      | 0.75307614 | 0.00055258 |
| ZFYVE19     | 0.75302631 | 0.00055297 |
| POU6F1      | 0.75297726 | 0.00055336 |
| LYPD6B      | 0.75280616 | 0.00055568 |
| RP11-339B21 | 0.752773   | 0.00055568 |
| LMAN2       | 0.752629   | 0.00055755 |
| ARAP1       | 0.75246887 | 0.00056019 |
| CRY2        | 0.75238373 | 0.00056019 |
| RCN1        | 0.7523279  | 0.00056073 |
| EMC3        | 0.75222058 | 0.00056173 |
| KCNAB2      | 0.75206749 | 0.00056442 |
| PQLC3       | 0.75191618 | 0.00056604 |
| CCDC159     | 0.75187062 | 0.00056604 |
| ANKRD19P    | 0.7518299  | 0.00056626 |
| HOXB7       | 0.75154007 | 0.00057076 |
| TSG101      | 0.75145415 | 0.00057188 |
| VPS33A      | 0.75091735 | 0.0005812  |
| SKP1        | 0.75021437 | 0.00059166 |
| FBXO31      | 0.75011502 | 0.00059325 |
| CLDN15      | 0.75007548 | 0.00059346 |
